# Supplementary material for: Cellulose-templated Bi2SiO5nanorods with enhanced UV/vis light utilization efficiency for high-performance photocatalytic degradation of organic contaminants
Source: Royal Society of Chemistry journal article supplement (doi:10.1039/d3ce00511a), 2023-01-01
Supplement: d3ce00511a1.pdf [file d3ce00511a1.pdf]

**Electronic Supplementary Material (ESI) for CrystEngComm.**  
**This journal is © The Royal Society of Chemistry 2023**

## **Electronic Supplementary Information**

**Cellulose-templated Bi<sub>2</sub>SiO<sub>5</sub> nanorods with enhanced UV/Vis light utilization for high-performance photocatalytic degradation of organic contaminants**

*Yiyan Cai,<sup>a</sup> Shuo Zhang,<sup>a</sup> Weizhi Zhu,<sup>a</sup> Haohang Fang,<sup>a</sup> Hongjie Wang,<sup>a</sup> Shaohong Shi,<sup>a</sup> Jianping Sun,<sup>a</sup> Yiqiang Wu,<sup>b</sup> Fangchao Cheng<sup>a,b\*</sup>*

<sup>a</sup> State Key Laboratory of Featured Metal Materials and Life-cycle Safety for Composite Structures, School of Resources, Environment and Materials, Guangxi University, Nanning 530004, China

<sup>b</sup> College of Material Science and Engineering, Central South University of Forestry and Technology, Changsha 410004, China

\* Corresponding author: fangchaocheng@gxu.edu.cn

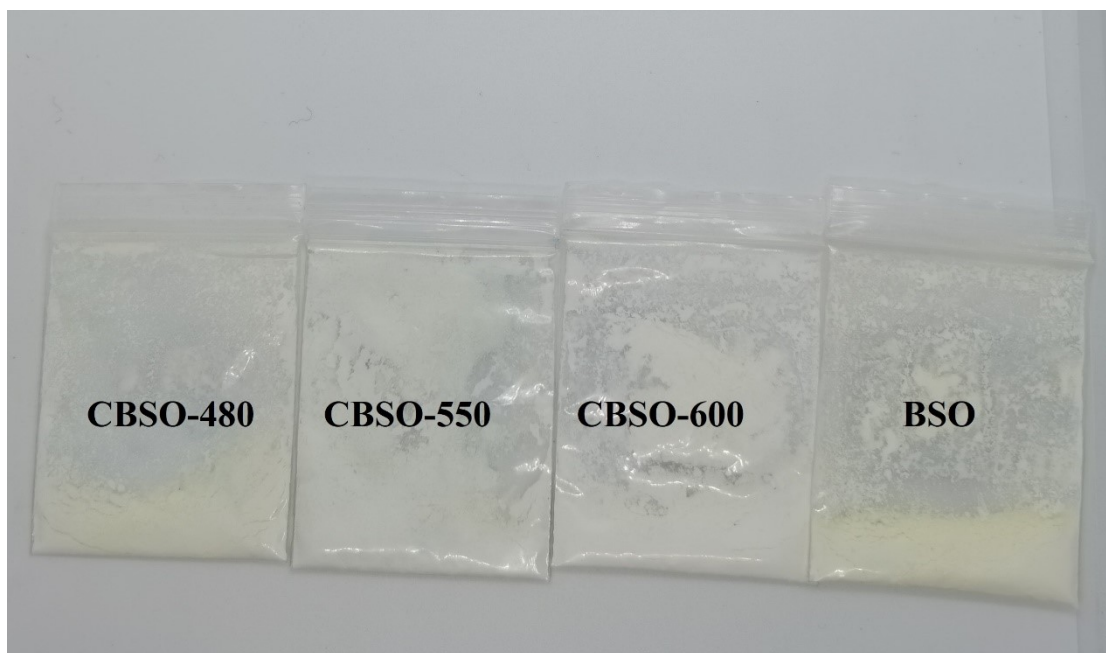

**Fig. S1** The digital photograph of the photocatalysts.

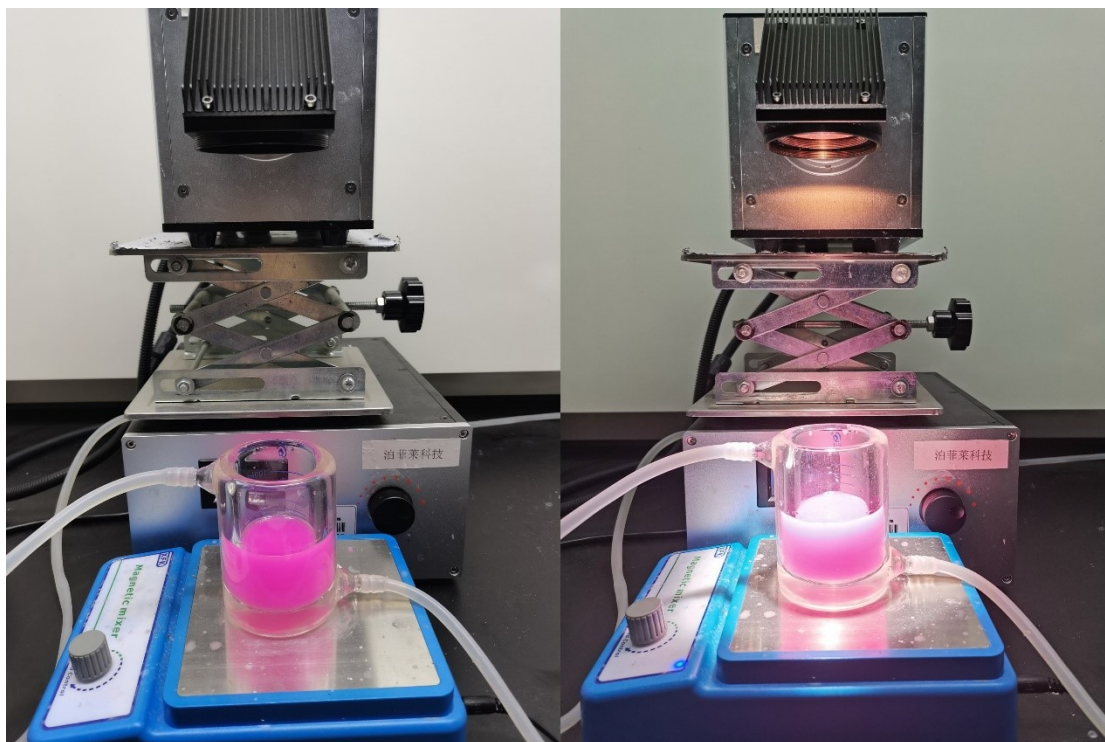

**Fig. S2** Experimental apparatuses for RhB degradation (Left: light off; Right: light on.).

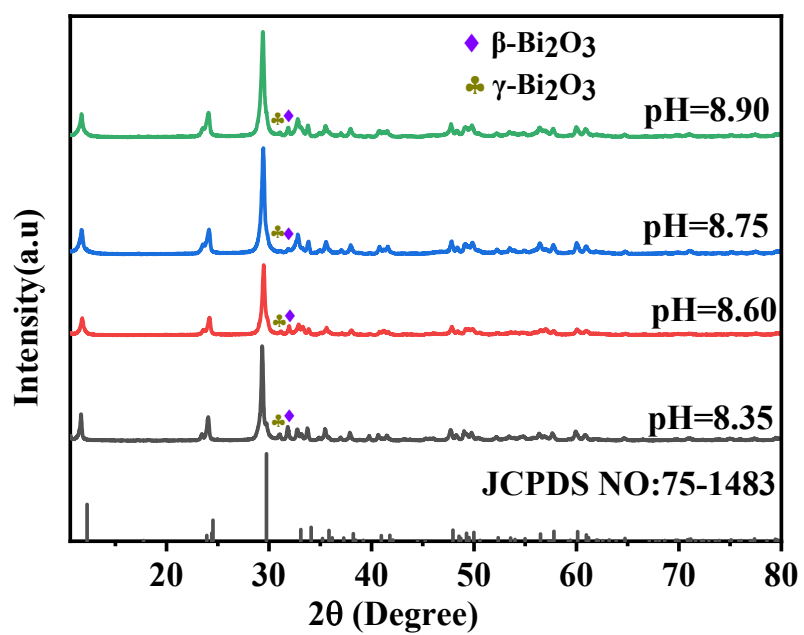

Fig. S3 XRD patterns of CBSO samples prepared with different pH values.

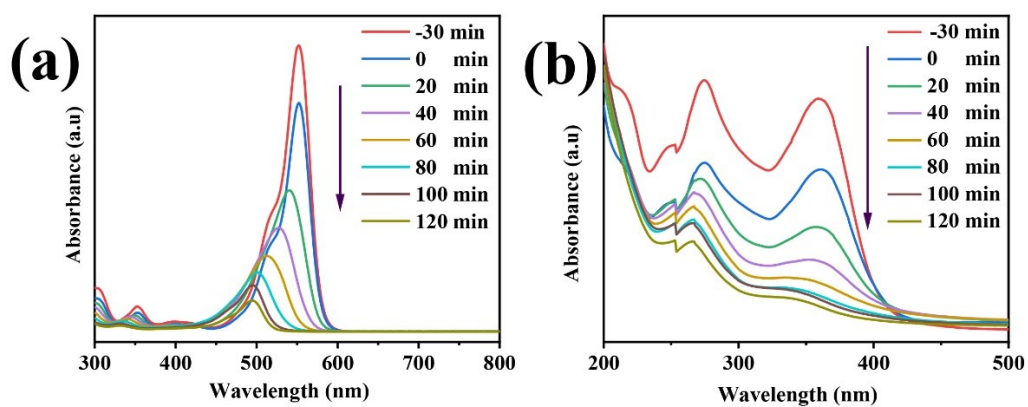

**Fig. S4** UV-Vis absorption spectra of (a) RhB and (b) TC in the presence of the CBOS-600 under visible light.

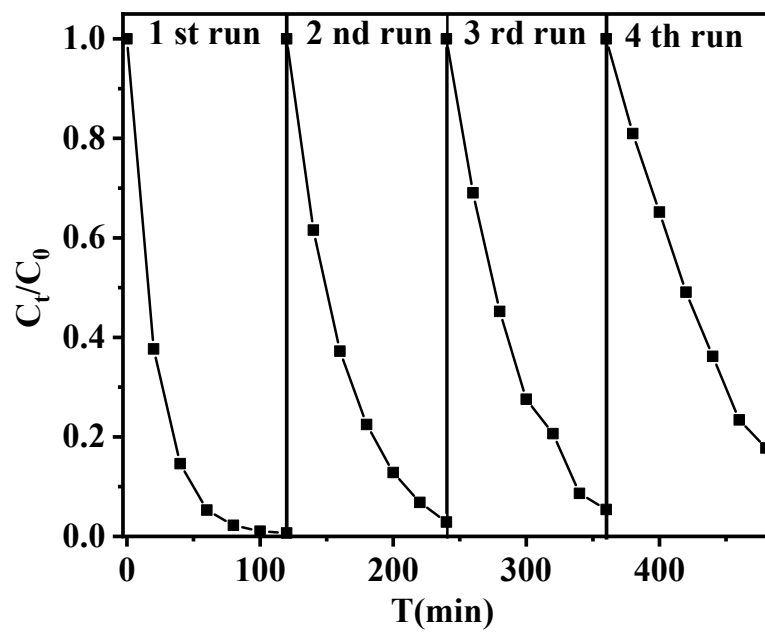

Fig. S5 The reusability of the CBOS-600 catalyst.

**Table S1** The FWHM and crystal size of Bi<sub>2</sub>SiO<sub>5</sub> crystal

| Crystal Face | Photocatalysts | 2 Theta/degree | FWHM | Crystal size/nm* |
|--------------|----------------|----------------|------|------------------|
| (311)        | CBSO           | 29.38          | 0.35 | 24.20            |
|              | BSO            | 29.38          | 0.29 | 29.31            |

\*The crystal size was calculated with the Scherrer formula:

$$D = K\lambda/\beta\cos\theta$$

where D is crystalline size, K is a constant (0.9),  $\lambda$  represents the wavelength of the incident X-rays (1.5406 Å),  $\beta$  is the full width at half maximum (FWHM) and  $\theta$  is the Bragg angle for the diffraction peaks.

**Table S2** Structural parameters of the BSO and CBSO.

| <b>Samples</b>                                                                   | <b>BET (m<sup>2</sup>.g<sup>-1</sup>)</b> | <b>Pore volume (cm<sup>3</sup>.g<sup>-1</sup>)</b> | <b>Average pore size (nm)</b> |
|----------------------------------------------------------------------------------|-------------------------------------------|----------------------------------------------------|-------------------------------|
| <b>BSO</b>                                                                       | 20.775                                    | 0.148                                              | 7.264                         |
| <b>CBSO-600</b>                                                                  | 50.143                                    | 0.207                                              | 3.007                         |
| <b>Bi<sub>2</sub>SiO<sub>5</sub>/Bi<sub>12</sub>SiO<sub>20</sub><sup>1</sup></b> | 20.7                                      | 0.05                                               | 4.4                           |
| <b>Bi<sub>2</sub>SiO<sub>5</sub><sup>2</sup></b>                                 | 44.7                                      | 0.32                                               | 28.8                          |
| <b>OVs-Bi<sub>2</sub>SiO<sub>5</sub><sup>3</sup></b>                             | 44.2                                      | 0.24                                               | 10.9                          |



**Table S3** Comparison of RhB degradation using various photocatalysts.

| Ref       | Photocatalyst                                                      | Catalyst dosage (g/L) | Concentration (mg/L) | Reaction Time (min) | Degradation (%) | Light source             |
|-----------|--------------------------------------------------------------------|-----------------------|----------------------|---------------------|-----------------|--------------------------|
| This work | Bi <sub>2</sub> SiO <sub>5</sub> nanoparticles                     | 2                     | 100                  | 120                 | 99.88           | Xenon lamp, 300 W Vis    |
|           |                                                                    | 2                     | 100                  | 60                  | 100             | Xenon lamp, 300 W UV+Vis |
| 4         | Bi <sub>2</sub> S <sub>3</sub> /Bi <sub>4</sub> O <sub>7</sub>     | 0.5                   | 10                   | 60                  | 99.2            | Xenon lamp, 500 W Vis    |
| 5         | C-WO <sub>3</sub>                                                  | 0.5                   | 20                   | 180                 | 95              | Xenon lamp, 300 W Vis+UV |
| 6         | Fe-g-C <sub>3</sub> N <sub>4</sub>                                 | 0.4                   | 10                   | 150                 | 100             | Xenon lamp, 300 W Vis    |
| 7         | Au-SiO <sub>2</sub> /g-C <sub>3</sub> N <sub>4</sub>               | 1                     | 10                   | 90                  | 99.8            | Xenon lamp, 150 W Vis    |
| 8         | P-ZnO                                                              | 0.5                   | 5                    | 180                 | 100             | Halogen lamp, 300 W Vis  |
| 9         | Fe <sub>3</sub> O <sub>4</sub> /SiO <sub>2</sub> /TiO <sub>2</sub> | 0.5                   | 20                   | 180                 | 92.8            | Xenon lamp, 300 W UV     |

---

|    |                                                       |     |     |     |      |                                  |
|----|-------------------------------------------------------|-----|-----|-----|------|----------------------------------|
| 10 | TiO <sub>2</sub> /WO <sub>3-x</sub>                   | 1.5 | 10  | 100 | 97.4 | Xenon lamp,<br>500 W Vis         |
| 11 | TiO <sub>2</sub> /ZnO-g-C <sub>3</sub> N <sub>4</sub> | 0.5 | 5   | 120 | 99.6 | Mercury lamps<br>19 W UV         |
| 12 | ZnO-SiO <sub>2</sub>                                  | 0.5 | 7.2 | 60  | 74   | UV lamp,<br>300 W UV             |
| 13 | TiO <sub>2</sub>                                      | 1   | 10  | 60  | 95   | UV lamp,<br>7 W UV               |
| 14 | B/W-TiO <sub>2</sub>                                  | 0.4 | 5   | 60  | 90.4 | Xenon lamp,<br>500 W Sunlight    |
| 15 | ZnO/G/C <sub>3</sub> N <sub>4</sub>                   | 1   | 10  | 80  | 100  | Xenon lamp,<br>200 W Vis         |
| 16 | WO <sub>3</sub> /g-C <sub>3</sub> N <sub>4</sub>      | 0.5 | 5   | 90  | 91   | Tungsten lamp,<br>500 W Sunlight |

---

## References

1. Q. Zhang, Ravindra, H. Xia, L. Zhang, K. Zeng, Y. Xu and C. Xin, *Applied Surface Science*, 2022, **581**, 152337.
2. L. Dou, J. Zhong, J. Li, J. Luo and Y. Zeng, *Materials Research Bulletin*, 2019, **116**, 50-58.
3. L. Dou, J. Li, N. Long, C. Lai, J. Zhong, J. Li and S. Huang, *Surfaces and Interfaces*, 2022, **29**, 101787.
4. F. Mu, B. Dai, W. Zhao, X. Yang, X. Zhao and X. Guo, *Chinese Chemical Letters*, 2021, **32**, 2539-2543.
5. Y. Zheng, G. Chen, Y. Yu, Y. Zhou and F. He, *Applied Surface Science*, 2016, **362**, 182-190.
6. T. Ma, Q. Shen, B. Z. J. Xue, R. Guan, X. Liu, H. Jia and B. Xu, *Inorganic Chemistry Communications*, 2019, **107**, 107451.
7. X. Zhou, G. Zhang, C. Shao, X. Li, X. Jiang and Y. Liu, *Ceramics International*, 2017, **43**, 15699-15707.
8. R. Saffari, Z. Shariatinia and M. Jourshabani, *Environ Pollut*, 2020, **259**, 113902.
9. K.-H. Han, Y.-H. Kim, M.-H. Mun, J.-H. Yu and R.-H. Han, *Materials Research Express*, 2022, **9**, 025007.
10. Z. Liu, F. Zhang, C. Li and C. Inoue, *Catalysis Letters*, 2022, DOI: 10.1007/s10562-022-04079-z, <https://doi.org/10.1007/s10562-10022-04079-z>.
11. J. Hongxia, G. Yanlin, L. Longxiang, W. Xu and P. Wangjun, *Environmental Progress & Sustainable Energy*, 2023, **42**, e13968.
12. W. Ahmad, M. A. Basit, M. S. Khan, I. Ali and T. J. Park, *Physica E: Low-dimensional Systems and Nanostructures*, 2020, **124**, 114308.
13. W. Nachit, H. Ait Ahsaine, Z. Ramzi, S. Touhtouh, I. Goncharova and K. Benkhoucha, *Optical Materials*, 2022, **129**, 112256.
14. Z. Miao, G. Wang, L. Li, C. Wang and X. Zhang, *Journal of Materials Science*, 2019, **54**, 14320-14329.
15. H. Osman, Z. Su and X. Ma, *Environmental Chemistry Letters*, 2017, **15**, 435-441.
16. J. Zhao, Z. Ji, X. Shen, H. Zhou and L. Ma, *Ceramics International*, 2015, **41**, 5600-5606.
